# Supplementary material for: Perfluorooctane sulfonate (PFOS) and perfluorooctanoate (PFOA) acutely affect human α1β2γ2L GABAA receptor and spontaneous neuronal network function in vitro
Source: PubMed Central journal article supplement (PMC7093421; doi:10.1038/s41598-020-62152-2), 2020-03-24
Supplement: 41598_2020_62152_MOESM1_ESM.pdf [file 41598_2020_62152_MOESM1_ESM.pdf]

**Perfluorooctane sulfonate (PFOS) and perfluorooctanoate (PFOA) acutely affect human  $\alpha_1\beta_2\gamma_{2L}$  GABA<sub>A</sub> receptor and spontaneous neuronal network function *in vitro***

Anke M. Tukker, Lianne M.S. Bouwman, Regina G.D.M. van Kleef, Hester S. Hendriks, Juliette Legler and Remco H.S. Westerink

Supplemental data

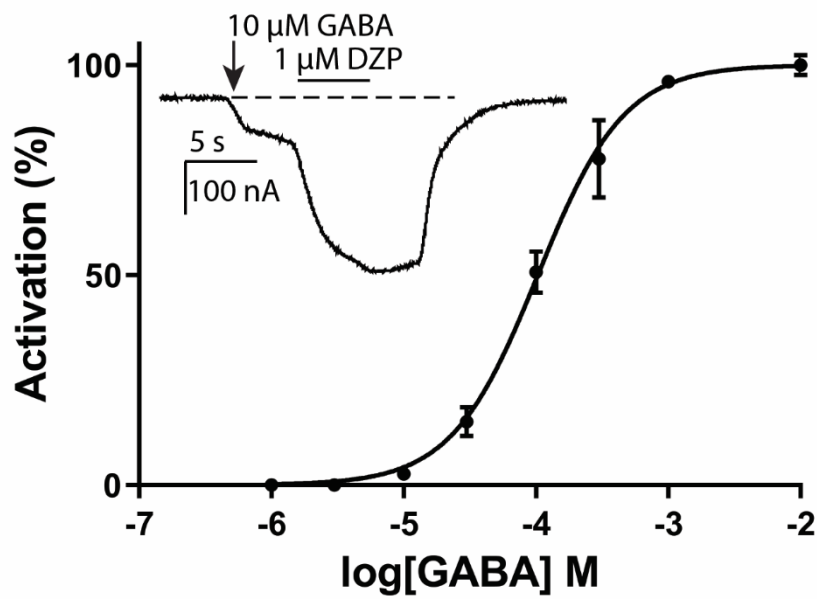

**Fig S1** Concentration-effect curve of the GABA-evoked ion current in oocytes expressing the  $\alpha_1\beta_2\gamma_{2L}$  subunits forming the GABA<sub>A</sub> receptor. Curve is fitted based on mean values ( $\pm$  SD) from 4 – 16 oocytes. Co-exposure of GABA and 1  $\mu$ M diazepam (DZP) evokes a potentiation confirming the presence of a functional  $\gamma_{2L}$  subunit (insert).

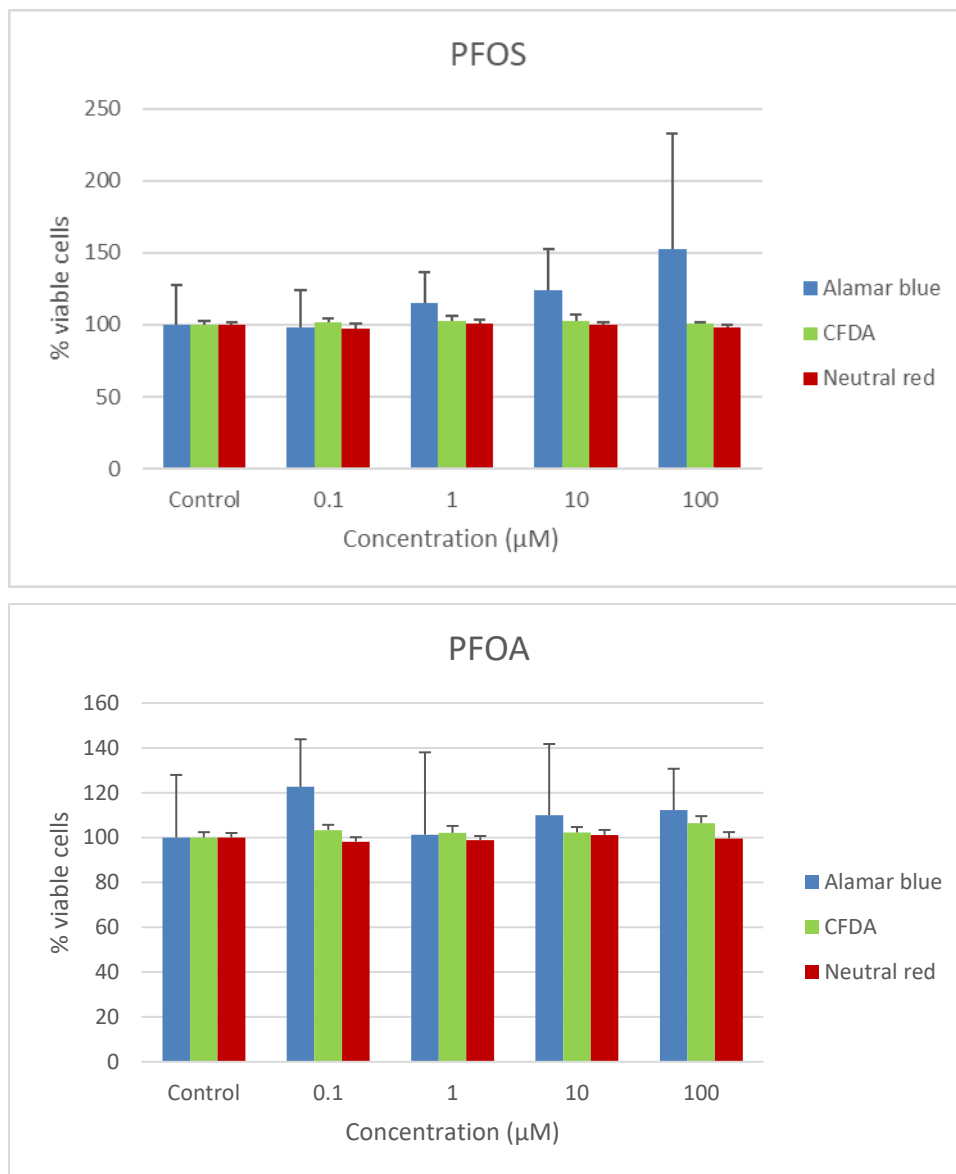

**Fig S2** Cytotoxicity data of PFOS (top) and PFOA (bottom) from an alamar blue (blue), CFDA (green) and neutral red (red) assay measured 24 h after a 30 min exposure of rat primary cortical cultures. No cytotoxicity can be observed.  $n = 6 - 12$  wells,  $N = 2$  plates. Data is presented as mean  $\pm$  SD.
